# Supplementary material
Source: PubMed Central journal article supplement (PMC1484575)
Supplement: pcbi.0020061.st001.pdf [file pcbi.0020061.st001.pdf]

| locus_tag | Gene name | Synonyms                     | NCBI_nucleotide_sequence | Entrez_gene_ID | Refseq_protein_accession_ID | SWISS-PROT |
|-----------|-----------|------------------------------|--------------------------|----------------|-----------------------------|------------|
| Rv0005    | gyrB      | Rv0005                       | 15607147                 | 887081         | NP_214519                   | P41514     |
| Rv0006    | gyrA      | Rv0006                       | 15607148                 | 887105         | NP_214520                   | Q07702     |
| Rv0129c   | fbpC      | 85C, fbpC2, mpt45, Rv0129c   | 57116693                 | 886885         | YP_177694                   | P31953     |
| Rv0429c   | def       | Rv0429c                      | 15607570                 | 886366         | NP_214943                   | P96275     |
| Rv0467    | icl       | aceA, Rv0467                 | 57116734                 | 886291         | YP_177728                   | O53752     |
| Rv0470c   | pcaA      | Rv0470c, umaA2               | 57116736                 | 886284         | YP_177730                   | Q7D9R5     |
| Rv0667    | rpoB      | Rv0667                       | 15607807                 | 888164         | NP_215181                   | Q9XC84     |
| Rv0682    | rpsL      | Rv0682                       | 15607822                 | 888259         | NP_215196                   | P41196     |
| Rv0764c   | cyp51     | Rv0764c                      | 15607904                 | 888819         | NP_215278                   | P77901     |
| Rv0899    | ompA      | Rv0899                       | 15608039                 | 885286         | NP_215414                   | Q10557     |
| Rv1267c   | embR      | Rv1267c                      | 15608407                 | 887026         | NP_215783                   | Q11052     |
| Rv1293    | lysA      | Rv1293                       | 15608433                 | 886960         | NP_215809                   | P31848     |
| Rv1305    | atpE      | Rv1305                       | 15608445                 | 886937         | NP_215821                   | Q10598     |
| Rv1484    | inhA      | Rv1484                       | 15608622                 | 886523         | NP_216000                   | P46533     |
| Rv1886c   | fbpB      | 85B, mpt59, Rv1886c          | 15609023                 | 885785         | NP_216402                   | P31952     |
| Rv2031c   | hspX      | acr, Rv2031c                 | 15609168                 | 887579         | NP_216547                   | P30223     |
| Rv2130c   | mshC      | cysS2, Rv2130c               | 15609267                 | 887492         | NP_216646                   | O33264     |
| Rv2220    | glnA1     | glnA, Rv2220                 | 15609357                 | 888383         | NP_216736                   | Q10377     |
| Rv2221c   | glnE      | Rv2221c                      | 15609358                 | 887995         | NP_216737                   | Q10379     |
| Rv2276    | cyp121    | Rv2276                       | 15609413                 | 888373         | NP_216792                   | Q59571     |
| Rv2539c   | aroK      | Rv2539c                      | 15609676                 | 887434         | NP_217055                   | P95014     |
| Rv2583c   | relA      | Rv2583c                      | 15609720                 | 887888         | NP_217099                   | Q50638     |
| Rv2711    | ideR      | dtxR, Rv2711                 | 15609848                 | 888590         | NP_217227                   | Q50495     |
| Rv2763c   | dfrA      | folA, Rv2763c                | 15609900                 | 887777         | NP_217279                   | O33305     |
| Rv2981c   | ddlA      | ddl, Rv2981c                 | 15610118                 | 888415         | NP_217497                   | P95114     |
| Rv3132c   | devS      | Rv3132c                      | 15610268                 | 888829         | NP_217648                   | P95194I    |
| Rv3133c   | devR      | dosR, Rv3133c                | 15610269                 | 888842         | NP_217649                   | P95193I    |
| Rv3134c   | Rv3134c   |                              | 15610270                 | 887558         | NP_217650                   | P95192I    |
| Rv3423c   | alr       | Rv3423c                      | 15610559                 | 887634         | NP_217940                   | Q50705     |
| Rv3601c   | panD      | Rv3601c                      | 15610737                 | 885596         | NP_218118                   | O06281     |
| Rv3602c   | panC      | Rv3602c                      | 15610738                 | 885459         | NP_218119                   | O06280     |
| Rv3608c   | folP1     | Rv3608c                      | 57117134                 | 885831         | YP_177997                   | O06274     |
| Rv3793    | embC      | Rv3793                       | 15610929                 | 886112         | NP_218310                   | P72059     |
| Rv3794    | embA      | Rv3794                       | 15610930                 | 886123         | NP_218311                   | P72060     |
| Rv3795    | embB      | Rv3795                       | 15610931                 | 886126         | NP_218312                   | P72030     |
| Rv3803c   | fbpD      | fbpC1, mpb51, mpt51, Rv3803c | 57117159                 | 886121         | YP_178017                   | Q48923     |

Rv3804c fbpA  
Rv3809c glf

85A, mpt44, Rv3804c  
ceoA, Rv3809c

15610940  
15610945

886132 NP\_218321  
886142 NP\_218326

P17944  
O06934
